# Supplementary material for: Shootins mediate collective cell migration and organogenesis of the zebrafish posterior lateral line system
Source: PubMed Central journal article supplement (PMC6704158; doi:10.1038/s41598-019-48585-4), 2019-08-21
Supplement: 41598_2019_48585_MOESM1_ESM.pdf [file 41598_2019_48585_MOESM1_ESM.pdf]

## **Supplementary information**

### **Shootins mediate collective cell migration and organogenesis of the zebrafish posterior lateral line system**

Akihiro Urasaki, Seiya Morishita, Kosuke Naka, Minato Uozumi, Kouki Abe, Ligu  
Huang, Emiko Watase, Osamu Nakagawa, Koichi Kawakami, Takaaki Matsui,  
Yasumasa Bessho & Naoyuki Inagaki

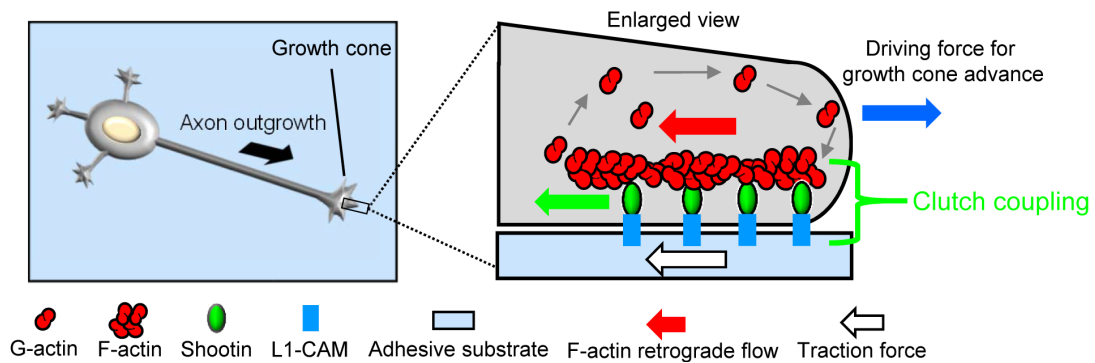

**Supplementary Figure S1. Mechanism of migration of the axonal growth cone.**

F-actins polymerize at the leading edge of the axonal growth cone and depolymerize proximally, thereby inducing retrograde flow of F-actins (red arrow). Shootin1 couples mechanically the F-actin retrograde flow and extracellular adhesive substrates, a process called “clutch coupling”, thereby transmitting the force of F-actin flow (red arrow) to the substrates as a traction force (white arrow)<sup>1-3</sup>. The driving force for growth cone advance (blue arrow) is produced as a counterforce to the traction forces exerted on the substrate (white arrow).

|                    |                                                                                              | CC1                               |     |
|--------------------|----------------------------------------------------------------------------------------------|-----------------------------------|-----|
| Mouse shootin1a    | MNSDDEKQLOLITSLKEQAIGEYEDLRAENOKTKKCKDIROERDEAVKLEEFOKISHMVIEEVNFMQNHLEIEKTCRESAEALATKL      |                                   | 90  |
| Zebrafish shootin1 | MASKGKKNKVRNDSLDLNQVLLQYESLQKEHEKIKKCKKLOEERDEALRKLNEFESVSHRVIEEVNSIQENLEIEKTCRESVEALASKL    |                                   | 90  |
| Zebrafish shootin2 | -----MWSLESVSDSEEDNTPSSEDERDFECOILEKERDEANEKLSRMEEASSHLKELDVLEMOFQIERSCRETAEAYALKV           |                                   | 78  |
| Zebrafish shootin3 | -----MDTTPLSAGCVSEMEAGGDAEBEGEAREGSTECCORLTAERDEAEROLKHKIKRVSQMVIEEVNVLQTOLEIEKSCRENAEALATKL |                                   | 84  |
|                    |                                                                                              | *       *       *       *       * |     |
|                    | ▼                                                                                            |                                   |     |
|                    |                                                                                              | CC2                               |     |
| Mouse shootin1a    | NKENKTLKRIS---MLYMAKLGPDVITEEINID-DDDPAITDAAAETCVSVQCQKQIKELRDQIVSVQEEKVLAIELENLKSGLGEVM     |                                   | 176 |
| Zebrafish shootin1 | NRQNRSLKRKS---MLYMSRLAADVVAE-ISID-DEDDAHEEEAGVCSSSHCHIVITELRDKLEEILATKKQLMIDLETTREQLSKTR     |                                   | 175 |
| Zebrafish shootin2 | SKDFKVLKRQSQALLPLIQDMPENLSALNLDSEADLSSDSVPAEDSSDPLLMSONQIRELOSSVDRLLEGEKIQLCAQVDLLKKEKEDLK   |                                   | 168 |
| Zebrafish shootin3 | NCENRKLKYLIS---LSSRPCLD-ELLPSISDCT-SLEEEVEQQDHSSDSFS-QYKQQVKDLQETVSSLLLEKKQLACQLQEQQRQIKELT  |                                   | 168 |
|                    | ** *                                                                                         | *       *                         |     |
|                    | ▼                                                                                            |                                   |     |
| Mouse shootin1a    | EEVNVKQKOEAVLNSEVLEQRKVKLEKCNRVSMIAVEEYEELOVNLELEKDLRKAESFAQEMFIEQNKLRQSHLLQSSLPDQOLLKAL     |                                   | 266 |
| Zebrafish shootin1 | OELLKEKHNDTVLIAETFQKKLLGKYNRVSYALDEFESLQEDLKLERDLRSEAEKFAHEMLIEQKKLKRQSVLVQSISVGEALQKAL      |                                   | 265 |
| Zebrafish shootin2 | EKLVLEIAGEKALLKLSKOSRTVINKIKRVSQVLTDFEETISQKLEMQDLRQHAEVFAHQMLVKQRETQRQ---IQNAETEQLQOQL      |                                   | 258 |
| Zebrafish shootin3 | ALREKQOAEKMLYKTIIDQOSKTIKRFNRVSMVAETVENMKQDLLEQSLRQKAETIAHEMMVKQKEANRQSMILQOQADPSIQLLKAL     |                                   | 258 |
|                    | *       *       *       *       *       *       *       *       *                            | *       *       *       *       * |     |
|                    |                                                                                              | CC3                               |     |
| Mouse shootin1a    | DENAKLIQQLLEERIOHQKVKLEERLENEALHKEIHNLRQQLLELLEDDKRELEQKYQSSEKARNLKHVSDELO -----KRV          |                                   | 345 |
| Zebrafish shootin1 | AEISTLTHLEKORLEHQQVKALEEQVNSSEVKKQLTALQROTDLLEERKEWQHKKTKAETAKDLRFTVEELK-----KKL             |                                   | 344 |
| Zebrafish shootin2 | SOVSDISRALAEIRLCYQTMSS--QTAADLNSLDLTAIRTKLEISERESETEETOLRDSQOAVSALQEQIKLLQDKLREKEQIPLIIT     |                                   | 342 |
| Zebrafish shootin3 | EDVANVTKTLEERMQHQEKVKALETELEQCALRKLQVLQRLQLEILDEEKKETEGRLQEEKNTILEEKVQLQEA-RTSSDSASGPS       |                                   | 347 |
|                    | ** *       *                                                                                 | *       *                         |     |
|                    |                                                                                              | Proline-rich domain               |     |
| Mouse shootin1a    | NOSENSV-----PPPPPPPLPPPPP-NPIRSLMSMIRKRSHSPGNSAKKEKTTQPETAEEVTDLKRQAVEEMMDRIKKGVHL           |                                   | 423 |
| Zebrafish shootin1 | QOVSNPPTAAPAPP--PPPPPPPPPPSSSSS-NPLSLLSILRKKKDVSTEIALVEKDS-SEKSPE-KDVRQQAVIDEMMLRIKKGVQL     |                                   | 431 |
| Zebrafish shootin2 | DQSEETNDNPSDPLPPPPPPPPPPPPPPPPSSFVTDPLKALRNKAGENTTQAKPTITE--DMKARAVDEMMEIRIKKGIIVL           |                                   | 432 |
| Zebrafish shootin3 | PGTAPPAPPAPP--PPPPPPPPPPPPSRCNPLSSLIAMRKS SKGGKGTPKLEQAPVNEAVD---DVVKVAVNEMMERIKHGVVL        |                                   | 435 |
|                    | **       *       *                                                                           | *       *       *       *       * |     |
| Mouse shootin1a    | RPV-NQTA-R-----PKAKPDSLKGSSEAVDELKGLASQ-----                                                 |                                   | 456 |
| Zebrafish shootin1 | RPV-SQTNR-----VRPGPKPTASNSAIQELQGLINTVVKRPGPSSSPGPRPSPSEKSELEKALQRRREAVKSAKNNNTSSS           |                                   | 507 |
| Zebrafish shootin2 | KPVLPPHVASDENAWKQQRSENKSAVLELQEMLDNVRSSAPRRVSSKRFNRVGEAELQMLVQRRRRAMGDDKVTPPSPFKPKDSF        |                                   | 519 |
| Zebrafish shootin3 | RPVKSQDKRFRGFKLPSFVTAASAAAIVEEKHQESAMEELKGILETVKKS-PSRGFQEVAVHKD-SELEVILRRRRKQA-CDTGAEDNGQ   |                                   | 519 |
|                    | **                                                                                           |                                   |     |
| Mouse shootin1a    | -----                                                                                        |                                   | 456 |
| Zebrafish shootin1 | VVDLTQIKQTRSEPGQNTGDQETLRHTTTICTEQLS-----                                                    |                                   | 544 |
| Zebrafish shootin2 | VSSSPWAGESGSAFVLRRLQONREKRVSRIKASESIIWEK-----                                                |                                   | 561 |
| Zebrafish shootin3 | LSKVSSNSLNGRHSSD SGKDTGFPSSSLSGSEKRSRTSSDSSGREPAVVQSSDSGMEKGAQTDSDCRSLTEKEPIETITNGCCSGE      |                                   | 579 |
| Mouse shootin1a    | -----                                                                                        |                                   | 456 |
| Zebrafish shootin1 | -----                                                                                        |                                   | 544 |
| Zebrafish shootin2 | -----                                                                                        |                                   | 561 |
| Zebrafish shootin3 | QQDGDPEKWTGNGIGHVAHGDLQTTISSSAQS PNAANSSTDAEC                                                |                                   | 655 |

### Supplementary Figure S2. Multiple sequence alignment of shootin proteins.

Amino acid sequences of zebrafish shootin1, shootin2 and shootin3 are aligned with mouse shootin1. Identical residues are shown by asterisks. Red underlines indicate coiled-coil domains predicted by SMART<sup>4</sup>. Blue underlines indicate proline-rich domains. Arrowheads indicate putative sites for phosphorylation by Pak1<sup>5</sup>.

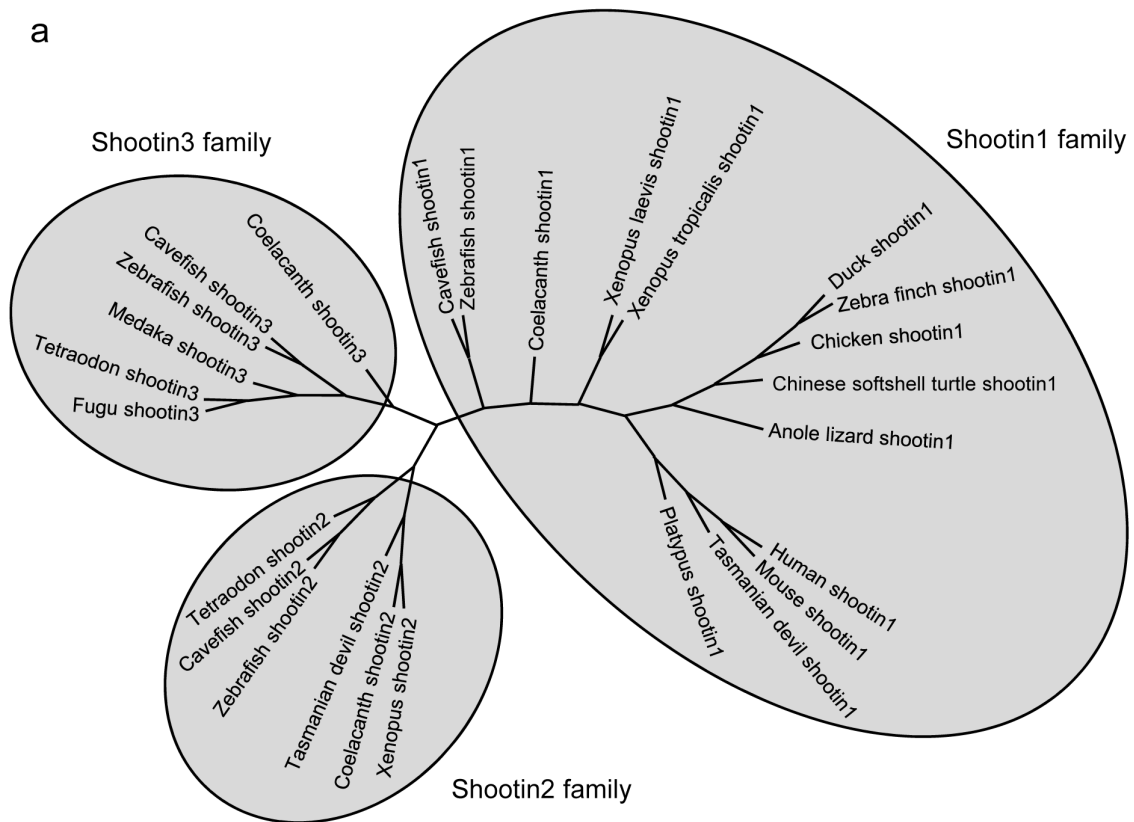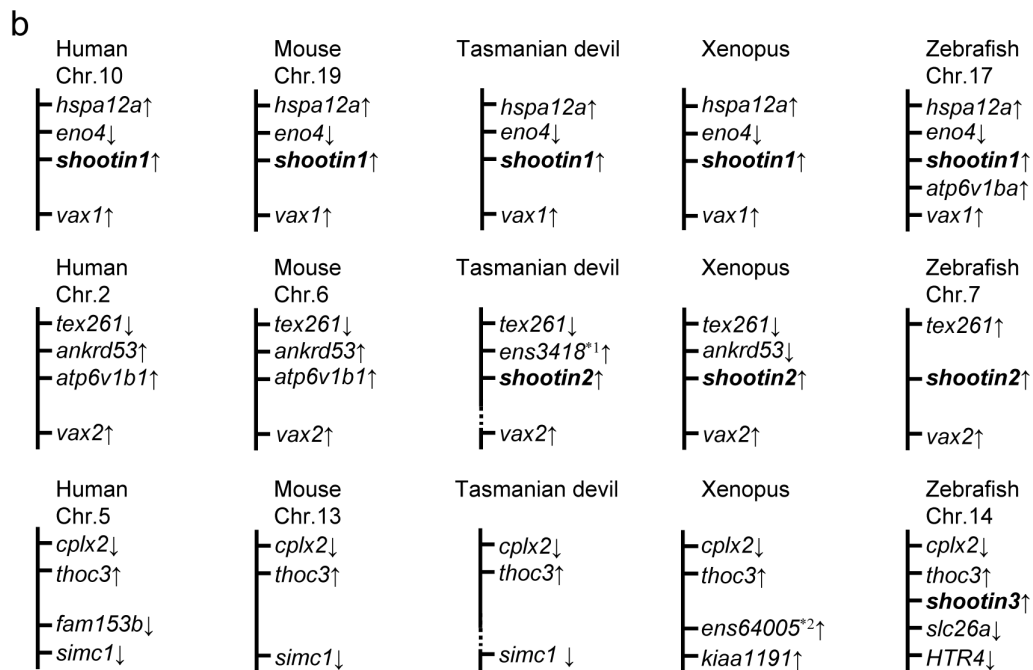

**Supplementary Figure S3. Phylogenetic tree and synteny analysis of vertebrate shootin genes.**

(a) Phylogenetic tree of vertebrate shootins. Accession numbers of protein sequences used in the phylogenetic analysis are listed in Supplementary Table S2. (b) Synteny analysis of vertebrate shootin genes in human, mouse, Tasmanian devil, *Xenopus* and zebrafish genome assemblies. Arrows indicate the translational orientation of genes. Dashed lines represent synteny breaks. Loci containing shootin genes in the Tasmanian devil and *Xenopus* genomes are mapped onto sequence scaffolds. ens3418\*<sup>1</sup>: ENSSHAG0000003418; and ens64005\*<sup>2</sup>: ENSXETT00000064005.

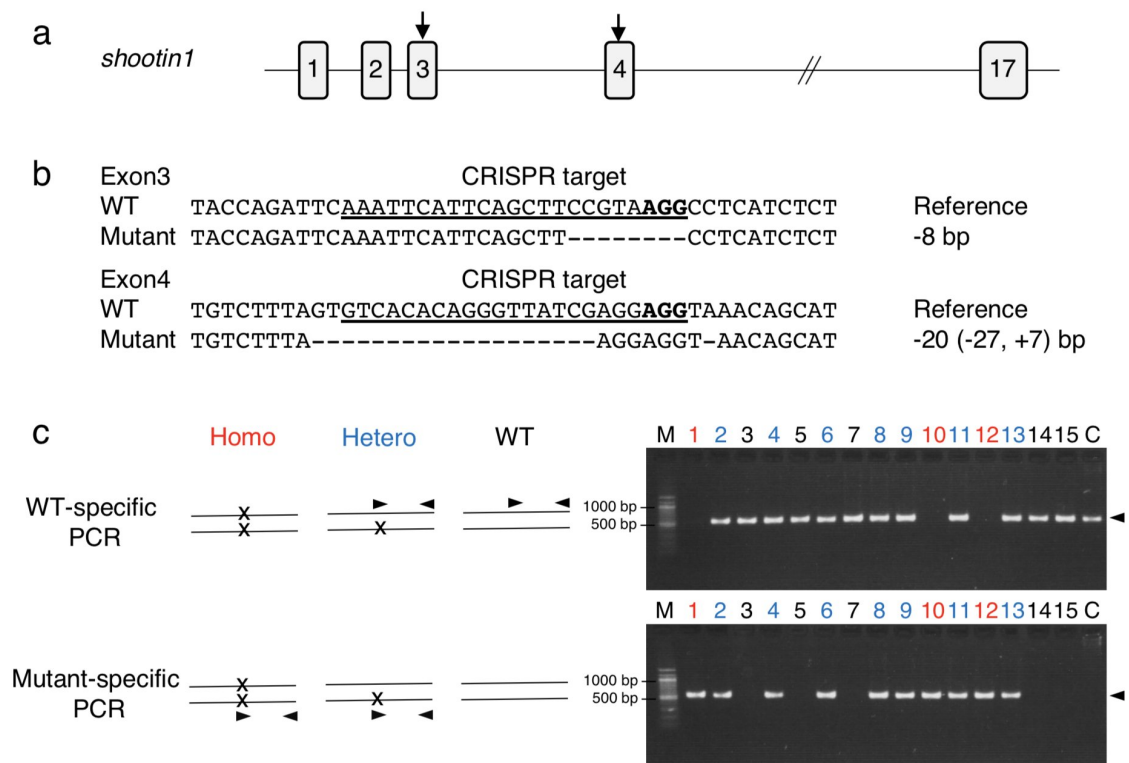

**Supplementary Figure S4. Generation of a *shootin1* mutant using the CRISPR/Cas9 system.**

(a) Schematic representation of the genomic structure of the *shootin1* gene. Numbers in boxes indicate the exon numbers of *shootin1*. Arrows indicate the positions of the CRISPR targets in *shootin1*. (b) DNA sequences of the *shootin1* CRISPR target in the wild type and *shootin1* mutant. Underlines indicate the sequences of the CRISPR target sites. Bold letters indicate protospacer adjacent motif (PAM) sequences. The *shootin1* mutant zebrafish carried two mutations in exon3 and exon4 because two *shootin1* gRNAs were injected with Cas9 mRNA into fertilized eggs. (c) PCR-based genotyping of *shootin1*. PCR reactions were performed using wild-type-specific primers and mutant-specific primers. The different colors of lane numbers indicate different genetic backgrounds: homozygous (red), heterozygous (blue) and wild type (black). Lane M, DNA marker; lane C, PCR products obtained using wild-type genomic DNA template as controls.

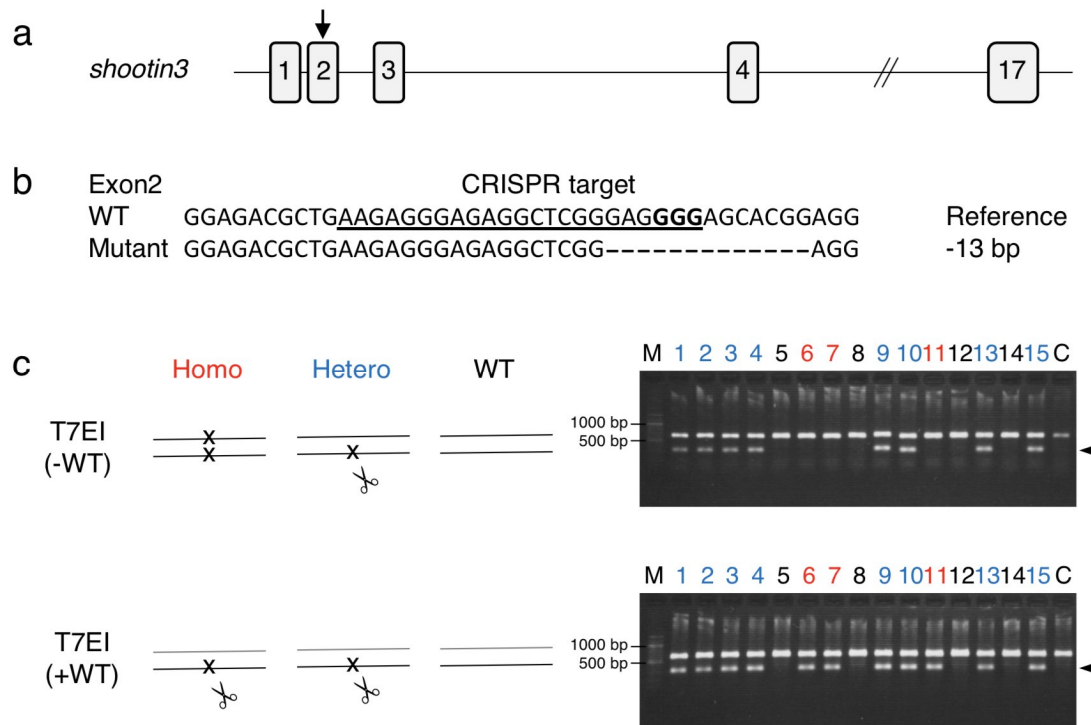

**Supplementary Figure S5. Generation of a *shootin3* mutant using the CRISPR/Cas9 system.**

(a) Schematic representation of the genomic structure of the *shootin3* gene. Numbers in boxes indicate the exon numbers of *shootin3*. The arrow indicates the position of the CRISPR target in *shootin3*. (b) DNA sequences of *shootin3* in the wild type and *shootin3* mutant. The underline indicates the sequence of the CRISPR target site. Bold letters indicate the PAM sequence. (c) T7EI-based *shootin3* genotyping. PCR reactions were performed using *shootin3*-specific primers. PCR products were denatured and reannealed without wild-type PCR products (–WT) or with wild-type PCR products (+WT). T7EI recognizes and cleaves mismatched bases in double-stranded DNA. The annealed double-strand DNAs were treated with T7EI and analyzed by electrophoresis in a 3% agarose gel. Arrowheads indicate T7EI-digested bands. The different colors of lane numbers indicate different genetic backgrounds: homozygous (red), heterozygous (blue) and wild type (black). A detailed explanation of T7EI-based genotyping is described in Supplementary Figure S6 and its legend. Lane M, DNA marker; lane C, PCR products obtained using wild-type genomic DNA template as controls.

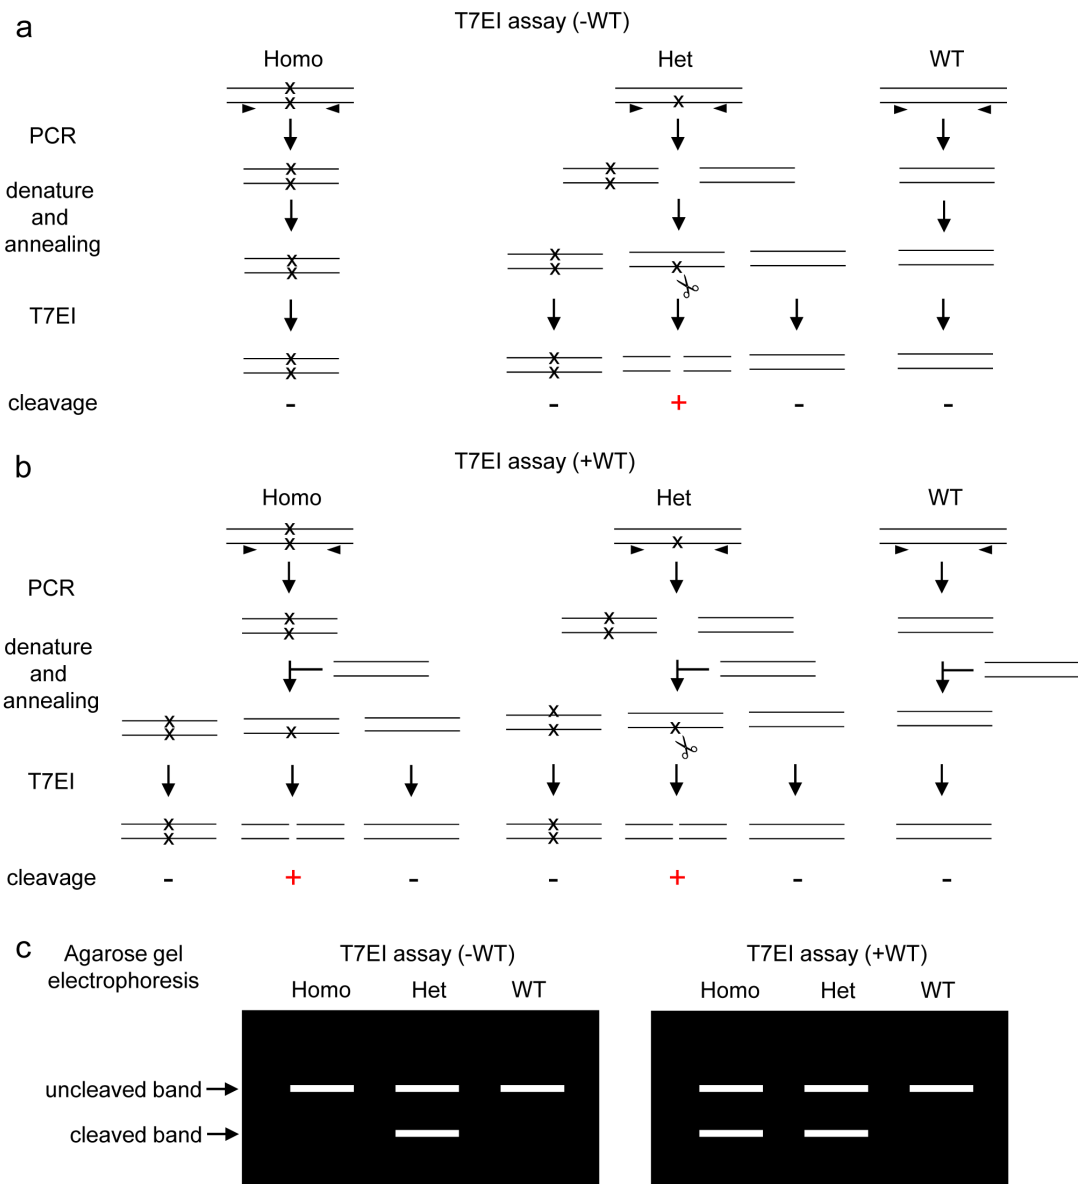

**Supplementary Figure S6. Schematic overview of T7EI-based genotyping.**

(a) T7EI assay without wild-type PCR products (-WT). PCR reactions are performed using *shootin3*-specific primers, and the PCR products are then denatured and reannealed without wild-type PCR products (-WT). The annealed double-stranded DNAs are treated with T7EI, which recognizes and cleaves mismatched bases in double-stranded DNA (scissors). The T7EI assay (-WT) can therefore distinguish heterozygous fish from homozygous and wild-type fish. (b) T7EI assay with wild-type PCR products (+WT). PCR reactions are performed using *shootin3*-specific primers. The PCR products are mixed with wild-type PCR products, and then denatured and



reannealed. The annealed double-stranded DNAs are treated with T7EI. The T7EI assay (+WT) can thus distinguish between homozygous/heterozygous fish and wild-type fish. (c) Expected results of T7EI-based genotyping. The T7EI-treated DNAs of (a) and (b) are analyzed by electrophoresis on a 3% agarose gel. Cleaved bands can be detected only in heterozygous fish (Het) in the T7EI assay (-WT), whereas the cleaved bands can be detected in both homozygous fish (Homo) and heterozygous fish (Het) in the T7EI assay (+WT). Arrowheads in (a) and (b) indicate PCR primers.

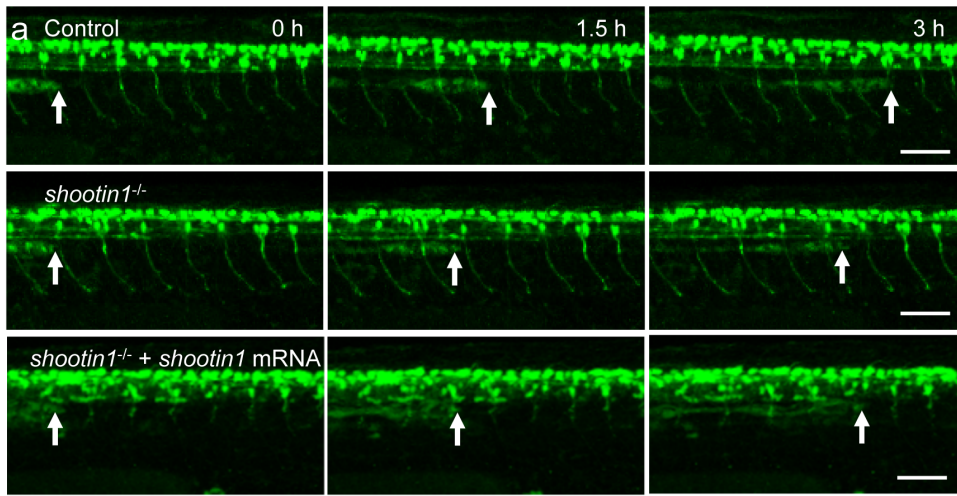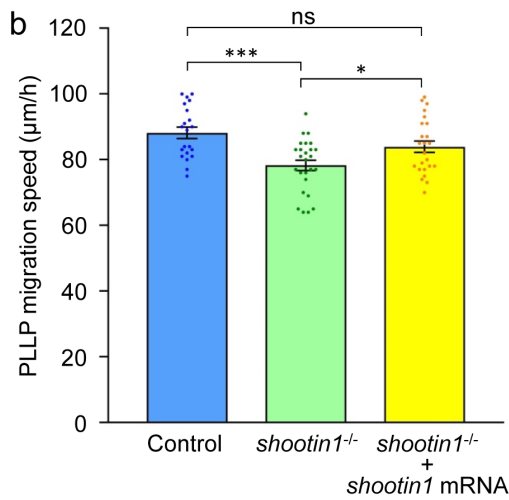

**Supplementary Figure S7. *shootin1* mutants display reduced migration speed of the PLLP.**

(a) Representative time-lapse images of wild-type control, *shootin1*<sup>-/-</sup> single mutant, and *shootin1* mRNA-injected *shootin1*<sup>-/-</sup> single mutant embryos carrying the SAIGFF213A;UAS:GFP construct. Arrows indicate the leading edges of PLLPs. Scale bars: 50 µm. (b) Migration speeds of PLLP in wild-type control ( $n = 21$ ), *shootin1*<sup>-/-</sup> single mutant ( $n = 26$ ) and *shootin1* mRNA-injected *shootin1*<sup>-/-</sup> single mutant ( $n = 24$ ) embryos at 32-38 hpf obtained from the analyses in (a). *shootin1* mRNA was injected into the *shootin1*<sup>-/-</sup> single mutant embryos. Data for the uninjected wild-type and *shootin1*<sup>-/-</sup> single mutant embryos in (b) are shared with those in Figure 3c. Data for (b) represent mean  $\pm$  SEM. Statistical significance of the differences is indicated with asterisks (\*\*\*,  $P < 0.01$ ; \*,  $P < 0.05$ ; ns, nonsignificant).

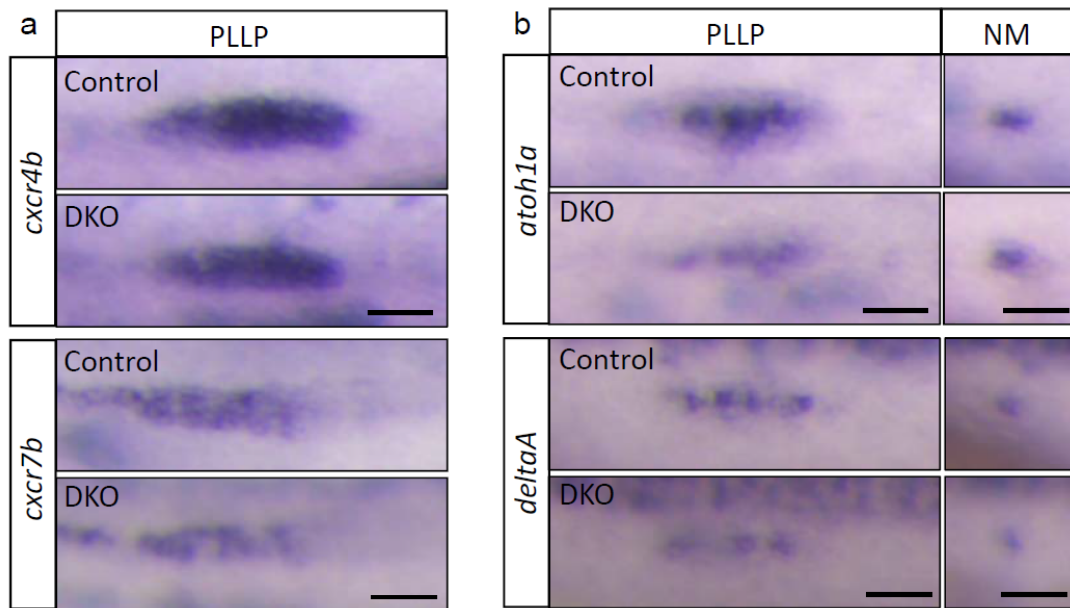

**Supplementary Figure S8. *In situ* hybridization of wild-type and *shootin1;shootin3* double mutant embryos at 32 hpf.**

(a) *In situ* hybridization of *cxc4b* and *cxc7b* in wild-type control (control) and *shootin1;shootin3* double mutant (DKO) PLLP at 32 hpf. (b) *In situ* hybridization of *atoh1a* and *deltaA* in wild-type control and *shootin1;shootin3* double mutant (DKO) PLLP and neuromasts (NM) at 32 hpf. Scale bars: 25  $\mu$ m.

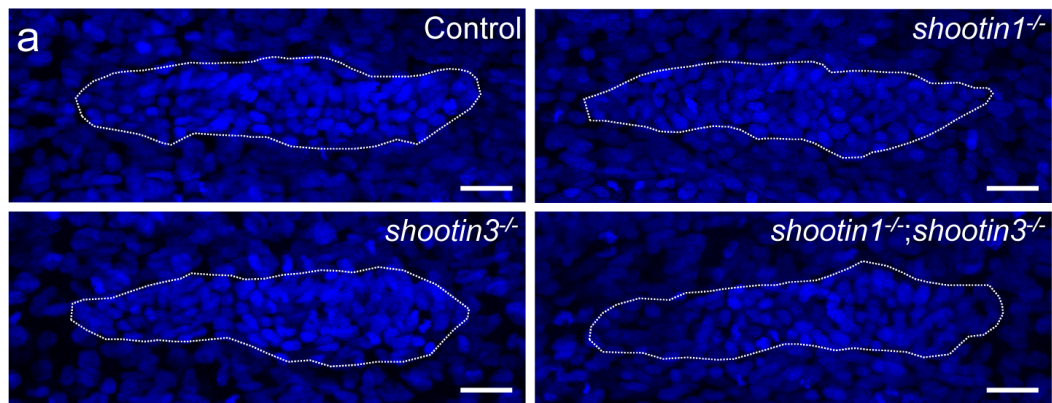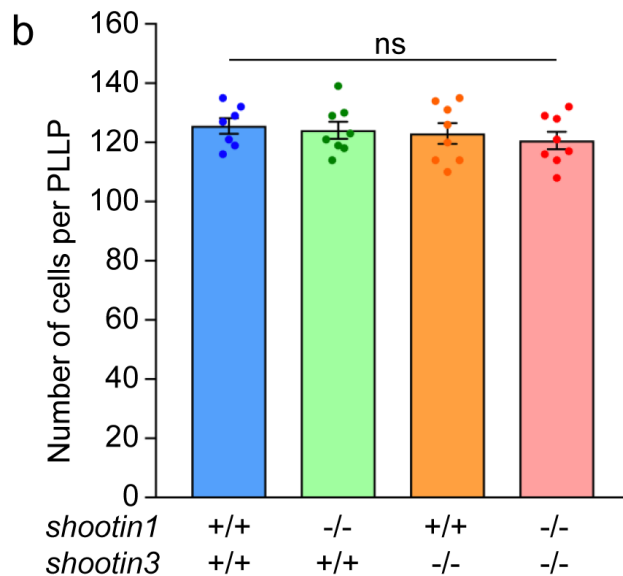

**Supplementary Figure S9. Mutations in *shootin1* and *shootin3* do not affect cell number in the PLLP at 24 hpf.**

(a) Representative images of DAPI-stained PLLP in wild-type control, *shootin1*<sup>-/-</sup> single mutant, *shootin3*<sup>-/-</sup> single mutant and *shootin1*<sup>-/-</sup>;*shootin3*<sup>-/-</sup> double mutant embryos at 24 hpf. Dotted lines indicate the areas of PLLP, in which small nuclei of PLLP cells cluster. Scale bars: 20 μm. (b) The number of cells in the PLLP of wild-type control (*n* = 7), *shootin1*<sup>-/-</sup> single mutant (*n* = 8), *shootin3*<sup>-/-</sup> single mutant (*n* = 8) and *shootin1*<sup>-/-</sup>;*shootin3*<sup>-/-</sup> double mutant (*n* = 8) embryos at 24 hpf was analyzed, using DAPI staining.

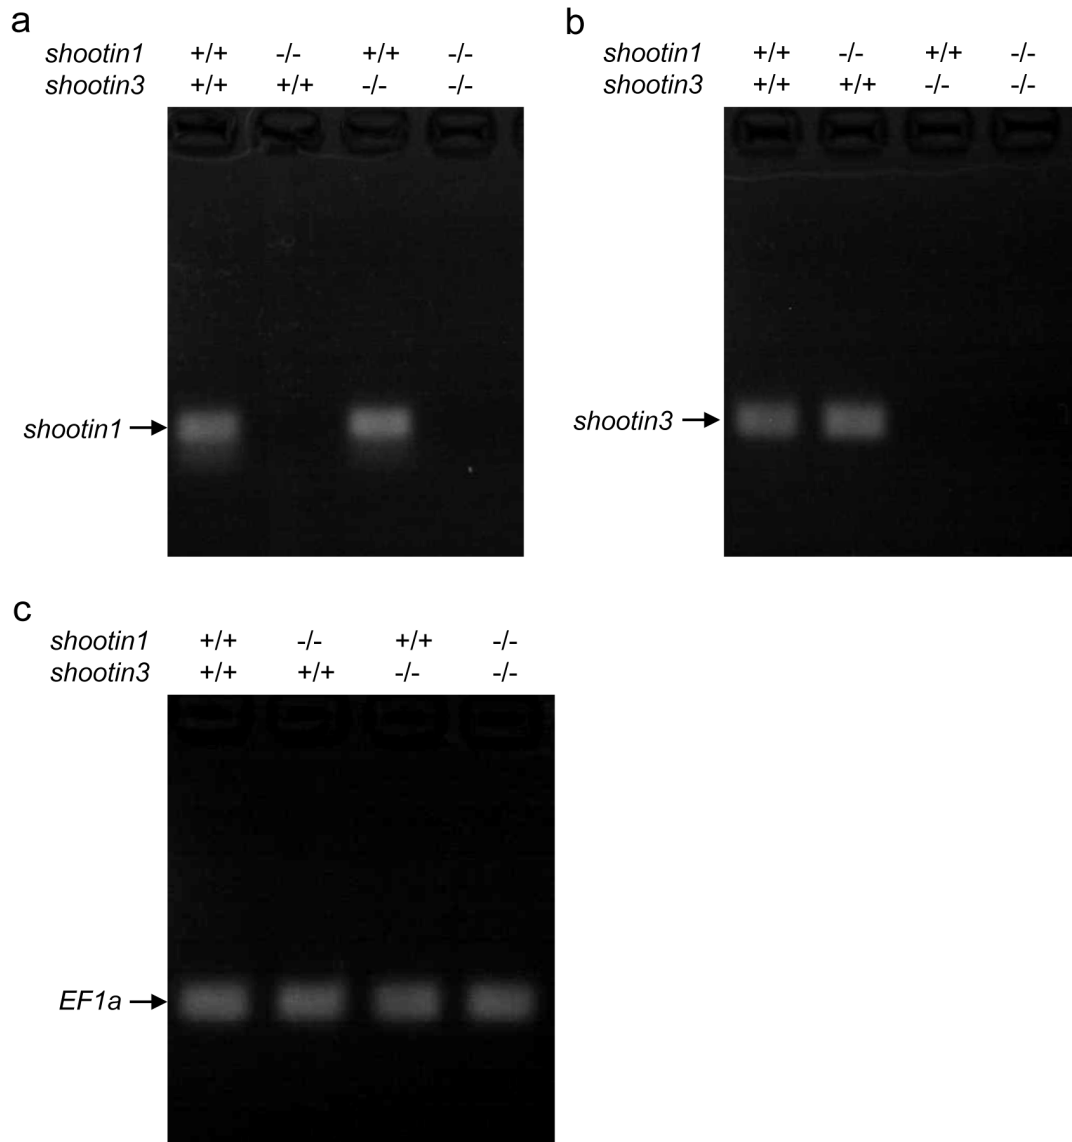

**Supplementary Figure S10 RT-PCR analysis of *shootin1*, *shootin3* and *EF1a* transcripts.**

(a) RT-PCR using *shootin1*-specific primers. (b) RT-PCR using *shootin3*-specific primers. (c) RT-PCR using *EF1a*-specific primers (positive control). Total RNA was prepared from wild-type, *shootin1* single mutant, *shootin3* single mutant and *shootin1;shootin3* double mutant embryos at 48 hpf.

**Supplementary Figure S11. Full-length gel images in Figure 1b.**

The full-length gel image in Figure 1b *shootin1*

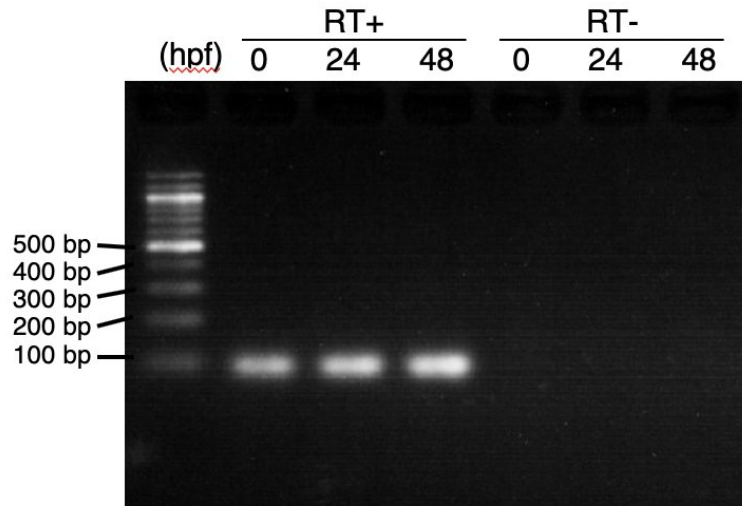

The full-length gel image in Figure 1b *shootin2*

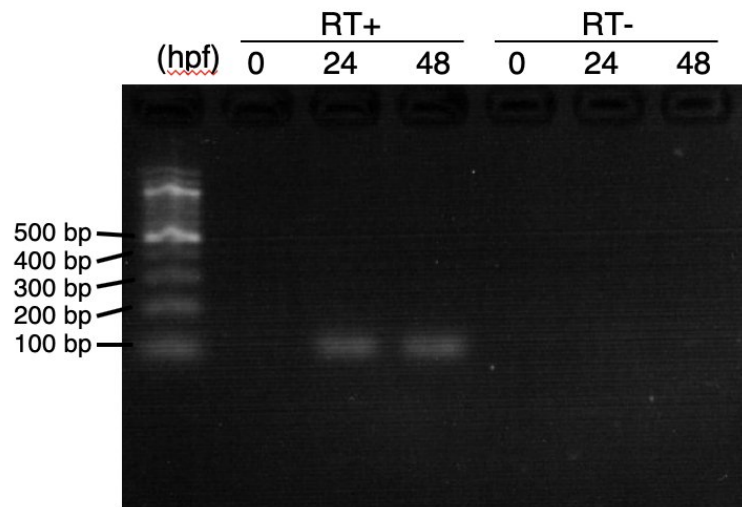

The full-length gel image in Figure 1b *shootin3*

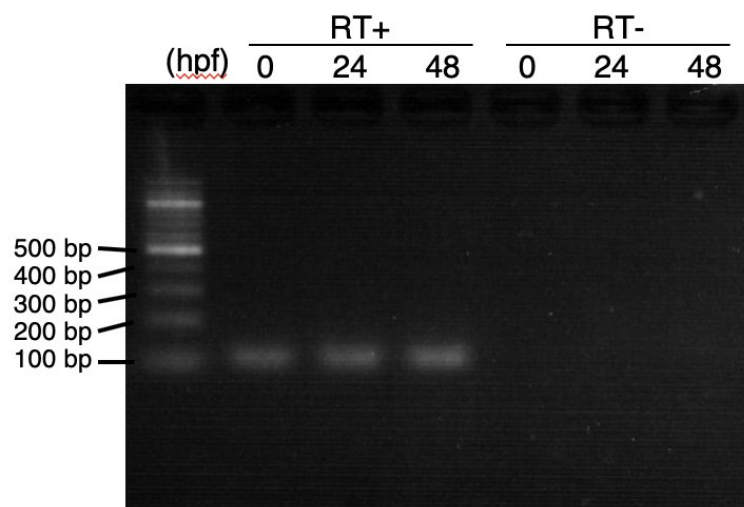

The full-length gel image in Figure 1b *EF1a*

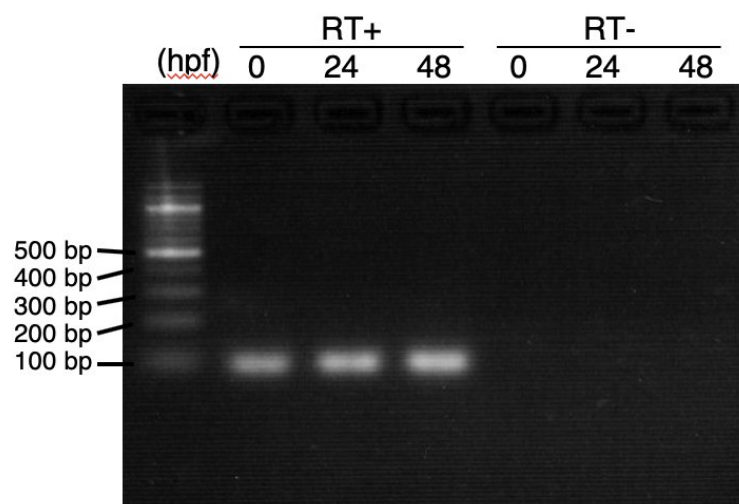

### Supplementary Table S1. Oligonucleotide list.

| Name                    | Sequence (5' to 3')                                                       |
|-------------------------|---------------------------------------------------------------------------|
| AP                      | GGCCACGCGTCGACTAGTACTTTTTTTTTTTTTTTTTT                                    |
| shootin1-h-Ba-Ko        | AAAGGATCCGCCACCATGGCGTCAAAAGGAAAGAAGAA                                    |
| shootin1-t-Xb-No        | TTTGC GGCCGCTCTAGACTATGAGAGCTGCTCAGTGCATAT                                |
| shootin2-h-Ba-Ko        | TTTGGATCCGCCACCATGTGGAGTCTTGAATCAGTATCAG                                  |
| shootin2-t-Xb-No        | TTTGC GGCCGCTCTAGATCACTTTTCTTCCCATATAATGGAC                               |
| shootin3-h-Ba-Ko        | AAAGGATCCGCCACCATGGATACGACGCCGCTGTCTGC                                    |
| shootin3-t-Sp           | TTTACTAGTTTAACTACTCGGCGTCTGTGCT                                           |
| pCS2-5'-out-Ba          | TTTGGATCCTGCAAAAAGAACAAGTAGCTTGTA                                         |
| pCS2-3'-out-Ba-Sp-Bg-Xb | TTTGGATCCGGGACTAGTGGGAGATCTGGGTCTAGATAAG<br>CTAGAACTATAGTGAGTCGTATTACGTAG |
| EGFP-h-Bg-Ko            | TTTAGATCTGCCACCATGGTGAGCAAGGGCGAGGAGCTG                                   |
| EGFP-t-Sp               | TTTACTAGTCTTGTACAGCTCGTCCATGCCG                                           |
| shootin1-h-Ba           | AAAGGATCCATGGCGTCAAAAGGAAAGAAG                                            |
| shootin2-h-Ba           | TTTGGATCCATGTGGAGTCTTGAATCAGTATCAG                                        |
| shootin3-h-Ba           | AAAGGATCCATGGATACGACGCCGCTGTCT                                            |
| shootin1-t-Sa           | TTTGTGCGACTGAGAGCTGCTCAGTGCATAT                                           |
| shootin2-t-Sa           | TTTGTGCGACCTTTTCTTCCCATATAATGGAC                                          |
| shootin3-t-Sa           | TTTGTGCGACACTAGTTTAACTACTCGGCGTCTGTGCT                                    |
| shootin1-rt-f           | ATTGCAAGAGGAGAGAGATGAGG                                                   |
| shootin1-rt-r           | CTCCTGAATGCTGTTACCTCCT                                                    |
| shootin2-rt-f           | TCCTCAGAAGATGAAAGAGACTTTG                                                 |
| shootin2-rt-r           | CCTTCAGCAGATGAGAAGAGG                                                     |
| shootin3-rt-f           | TGTGTGAGTGAGATGGAGGC                                                      |
| shootin3-rt-r           | AGCCTCATCTCTCTCTGCAGT                                                     |
| EF1a-rt-f               | AGCGGTACTACTCTTCTTGATGC                                                   |
| EF1a-rt-r               | TTGTACACATCCTGAAGTGGCA                                                    |
| shootin1-r2             | TCTGCCAGAGCTTTCTGTAGAGCTT                                                 |
| shootin2-h4             | TTTGGATCCATGTGGAGTCTTGAATCAGTATCAG                                        |
| shootin2-r4             | TGGGGAAGGAGGAGGCCGCAGTA                                                   |
| shootin3-f              | GGAAGTCTTCCAAGGGAGGTAAAGG                                                 |
| shootin1-f-ex3          | TAGGAAATTCATTCAGCTTCCGTA                                                  |
| shootin1-r-ex3          | AAACTACGGAAGCTGAATGAATTT                                                  |
| shootin1-f-ex4          | TAGGGTCACACAGGGTTATCGAGG                                                  |
| shootin1-r-ex4          | AAACCTCGATAACCCTGTGTGAC                                                   |



|                   |                           |
|-------------------|---------------------------|
| shootin3-f-ex2    | TAGGAAGAGGGAGAGGCTCGGGAG  |
| shootin3-r-ex2    | AAACCTCCCGAGCCTCTCCCTCTT  |
| shootin1 (ex3)-5' | TAATTACCCTAACCTTAACCTAGTC |
| shootin1 (ex3)-3' | TCTAGGGGAAATGTAGATAGAGCGA |
| shootin1 (ex3)-wt | TAGGAAATTCATTCAGCTTCCGTA  |
| shootin1 (ex3)-mt | ATTCAAATTCATTCAGCTTCCTCA  |
| shootin1 (ex4)-5' | ACCTTGTGTCCACCATATAAACAGT |
| shootin1 (ex4)-3' | ATTAGCTGAACCAGAACACCACAGA |
| shootin3 (ex2)-5' | ATGAGCCAAGCCTTCGCCATAGTAG |
| shootin3 (ex2)-3' | GGCCACATACAATGTGCCTCAAAGC |
| atoh1a-F          | ACGAGCTGCGCAGTGTCATC      |
| atoh1a-R          | CATGGCGTAGGGGTCTGGTC      |
| cxcr4b-F          | CGCGTGGGGAGACTTATTGC      |
| cxcr4b-R          | GCGGGTAAGTAAGCTCGCAGA     |
| cxcr7b-F          | TCTTCAGTGTC AACCTCTTCAGCA |
| cxcr7b-R          | GCCTTCATGAGGTCGTATCGGTAG  |
| deltaA-F          | GAAGATCGACCACTGCTCTTCCA   |
| deltaA-R          | ATTCTTAACCGGCGCCACTC      |

---

**Supplementary Table S2. Accession numbers of protein sequences used in the phylogenetic analysis.**

| Name                                                   | Accession numbers                         |
|--------------------------------------------------------|-------------------------------------------|
| <i>Danio rerio</i> (zebrafish) shootin1                | LC310870                                  |
| <i>Danio rerio</i> (zebrafish) shootin2                | LC310871                                  |
| <i>Danio rerio</i> (zebrafish) shootin3                | LC310872                                  |
| <i>Homo sapiens</i> (human) shootin1a                  | SHTN1-001 ENST00000615301.4               |
| <i>Mus musculus</i> (mouse) shootin1a                  | SHTN1-202 ENSMUST00000163821.1            |
| <i>Sarcophilus harrisii</i> (Tasmanian devil) shootin1 | ENSSHAT00000020502.1                      |
| <i>Sarcophilus harrisii</i> (Tasmanian devil) shootin2 | ENSSHAT00000004495.1                      |
| <i>Gallus gallus</i> (chicken) shootin1                | ENSGALT00000068208.1                      |
| <i>Anas platyrhynchos</i> (duck) shootin1              | SHTN1-201 ENSAPLT00000010851.1            |
| <i>Taeniopygia guttata</i> (zebra finch) shootin1      | SHTN1-201 ENSTGUT00000011512.1            |
| <i>Ornithorhynchus anatinus</i> (platypus) shootin1    | ENSOANT00000022297.3                      |
| <i>Anolis carolinensis</i> (anole lizard) shootin1     | SHTN1-201 ENSACAT00000010191.3            |
| <i>Pelodiscus sinensis</i> (Chinese softshell turtle)  | SHTN1-201 ENSPSIT00000015476.1            |
| <i>Xenopus laevis</i> (frog) shootin1                  | XM_018224676.1 (LOC108695700)             |
| <i>Xenopus tropicalis</i> (frog) shootin1              | XP_004915784.1                            |
| <i>Xenopus laevis</i> (frog) shootin2                  | LOC100486585.L                            |
| <i>Coelacanthiformes</i> (coelacanth) shootin1         | SHTN1-201 ENSLACT00000011686.1            |
| <i>Coelacanthiformes</i> (coelacanth) shootin2         | ENSLACT00000006377.1                      |
| <i>Coelacanthiformes</i> (coelacanth) shootin3         | ENSLACT00000008805.1                      |
| <i>Tetraodon nigroviridis</i> (tetraodon) shootin2     | si:ch211-1o7.3-201 ENSTNIT00000006279.1   |
| <i>Tetraodon nigroviridis</i> (tetraodon) shootin3     | si:dkey-280e21.3-201 ENSTNIT00000016149.1 |
| <i>Takifugu rubripes</i> (fugu) shootin3               | si:dkey-280e21.3-201 ENSTRUT00000007489.1 |
| <i>Oryzias latipes</i> (medaka) shootin3               | ENSORLT00000014420.1                      |
| <i>Astyanax mexicanus</i> (cave fish) shootin1         | SHTN1-201 ENSAMXT00000011964.1            |
| <i>Astyanax mexicanus</i> (cave fish) shootin2         | si:ch211-1o7.3-201 ENSAMXT00000005924.1   |
| <i>Astyanax mexicanus</i> (cave fish) shootin3         | si:dkey-280e21.3-201 ENSAMXT00000011022.1 |

Shootin1 in *Oryzias latipes*, *Tetraodon nigroviridis* and *Takifugu rubripes* and shootin2 in *Oryzias latipes*, *Takifugu rubripes* and *Xenopus tropicalis* were not annotated.

**Movie 1.** Fluorescent speckles of AcGFP-shootin1 and mRFP-actin in XTC fibroblasts. Images were acquired at 5-s intervals.

**Movie 2.** Fluorescent speckles of AcGFP-shootin2 and mRFP-actin in XTC fibroblasts. Images were acquired at 5-s intervals.

**Movie 3.** Fluorescent speckles of AcGFP-shootin3 and mRFP-actin in XTC fibroblasts. Images were acquired at 5-s intervals.

**Movie 4.** Time-lapse imaging of a wild-type control embryo of zebrafish carrying the SAIGFF213A;UAS:GFP construct. Movie starts and ends at approximately 32 and 38 hpf, respectively. Images were acquired at 20-min intervals.

**Movie 5.** Time-lapse imaging of a *shootin1*<sup>-/-</sup> single mutant embryo of zebrafish carrying the SAIGFF213A;UAS:GFP construct. Movie starts and ends at approximately 32 and 38 hpf, respectively. Images were acquired at 20-min intervals.

**Movie 6.** Time-lapse imaging of a *shootin3*<sup>-/-</sup> single mutant embryo of zebrafish carrying the SAIGFF213A;UAS:GFP construct. Movie starts and ends at approximately 32 and 38 hpf, respectively. Images were acquired at 20-min intervals.

**Movie 7.** Time-lapse imaging of a *shootin1*<sup>-/-</sup>;*shootin3*<sup>-/-</sup> double mutant embryo of zebrafish carrying the SAIGFF213A;UAS:GFP construct. Movie starts and ends at approximately 32 and 38 hpf, respectively. Images were acquired at 20-min intervals.

## References

- 1 Shimada, T. *et al.* Shootin1 interacts with actin retrograde flow and L1-CAM to promote axon outgrowth. *J Cell Biol* **181**, 817-829 (2008).
- 2 Kubo, Y. *et al.* Shootin1-cortactin interaction mediates signal-force transduction for axon outgrowth. *J Cell Biol* **210**, 663-676 (2015).
- 3 Baba, K. *et al.* Gradient-reading and mechano-effector machinery for netrin-1–induced axon guidance. *eLife* **7**, e34593 (2018).
- 4 Letunic, I. & Bork, P. 20 years of the SMART protein domain annotation resource. *Nucleic Acids Res* **46**, D493-D496 (2018).
- 5 Toriyama, M., Kozawa, S., Sakumura, Y. & Inagaki, N. Conversion of a signal into forces for axon outgrowth through Pak1-mediated shootin1 phosphorylation. *Curr Biol* **23**, 529-534 (2013).
